# Supplementary material for: Engineering stochasticity in gene expression
Source: Royal Society of Chemistry journal article supplement (doi:10.1039/b801245h), 2008-05-01
Supplement: b801245h.pdf [file b801245h.pdf]

Supplementary Table 1. rcRNA sequences.

Sequence shown is the engineered rcRNA DNA sequence which was cloned between the NcoI and BlnI sites on pACYCDuet-1 (Novagen). These sequences are transcribed from a T7 promoter, contain an upstream RBS and downstream T7 RNA polymerase transcription terminator.

| rcRNA | Sequence (5'-3')                |
|-------|---------------------------------|
| rc1   | aacgtcgccgccggaatatctccttaataag |
| rc2   | aacgtcgccgccggaattcctccttaataag |
| rc3   | aacgtcgccgccggaattcgaccttaataag |
| rc4   | aacgtcgccgccggaattcctcgataataag |
| rc5   | aacgtcgccgccggaattcgacgataataag |
| rc6   | aacgtcgccgccggaattccgggataataag |

Reporter Independence.

We determined the extent to which one fluorescent reporter protein is affected by the presence of a second. To accomplish this we compared the fluorescence intensities of *E. coli* strains carrying a CFP only expression construct, a YFP only expression construct and the monocistronic expression construct, J13065 carrying both genes in a constitutive background lacking TetR repressor. We found that the presence of one gene had no effect on expression of the other. The normalized fluorescence intensities per cell are shown below.

|          | CFP   | YFP   |
|----------|-------|-------|
| CFP only |       | 1     |
| YFP only |       | 1     |
| J13065   | 1.024 | 0.978 |
| % change | 2.4   | 2.2   |

Supplementary Material (ESI) for Molecular BioSystems

This journal is (c) The Royal Society of Chemistry, 2008

The data shown are uncorrected for filter bleedthrough. The contribution of CFP to the

YFP channel is 0.64% and the contribution of YFP to the CFP channel is 7.25%.
